# Supplementary material for: Robust route to efficient extraction of Cr from different Cr-containing hazardous wastes by capitalizing on a reduction–chlorination–volatility technique
Source: Royal Society of Chemistry journal article supplement (doi:10.1039/d2en00689h), 2022-01-01
Supplement: d2en00689h1.pdf [file d2en00689h1.pdf]

## **Robust Route to Efficient Extraction of Cr from Different Cr-containing Hazardous Wastes by Capitalizing on a Reduction-chlorination-volatility Technique**

Xueming Liu <sup>b</sup>, Jiaqing He <sup>a</sup>, Feng Gao <sup>a</sup>, Jin Zhou <sup>b</sup>, Xiaofeng Mo <sup>b</sup>, Zhen Wu <sup>b</sup>, Jiawei Lin <sup>b</sup>, Shi Wang <sup>c</sup>, Mengye Wang <sup>a,\*</sup>, and Zhang Lin <sup>b</sup>

<sup>a</sup> State Key Laboratory of Optoelectronic Materials and Technologies, School of Materials, Sun Yat-Sen University, Guangzhou 510275, PR China.

<sup>b</sup> School of Environment and Energy, Key Laboratory of Pollution Control and Ecosystem Restoration in Industry Clusters (Ministry of Education), South China University of Technology, Guangzhou 510006, PR China.

<sup>c</sup> Dongjiang Environmental Co. Ltd., Shenzhen 518000, PR China.

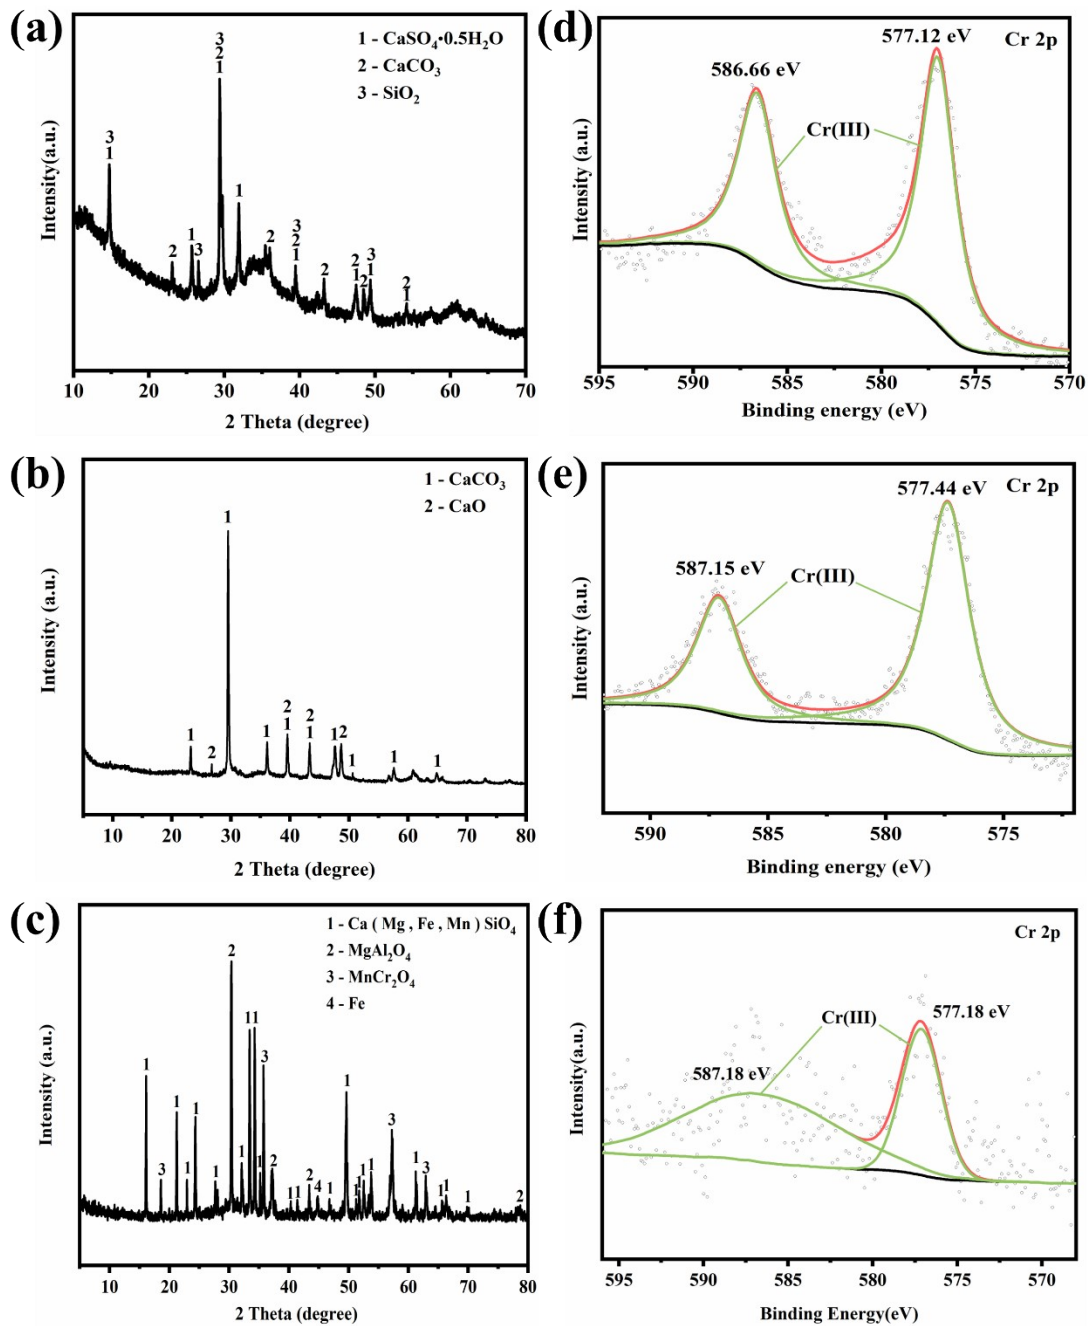

**Fig. S1** XRD patterns of (a) ES; (b) TS and (c) SSS. High-resolution XPS spectra of Cr 2p in (d) ES, (e) TS and (f) SSS.

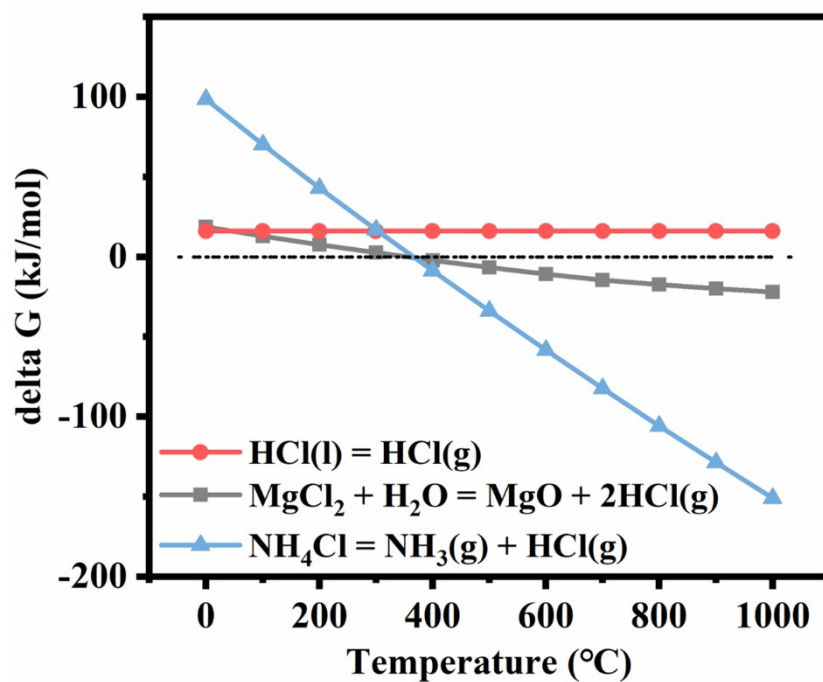

**Fig. S2** Gibbs free energy of decomposition of the  $\text{MgCl}_2 \cdot 6\text{H}_2\text{O}$ ,  $\text{HCl}$  and  $\text{NH}_4\text{Cl}$  at different temperatures.

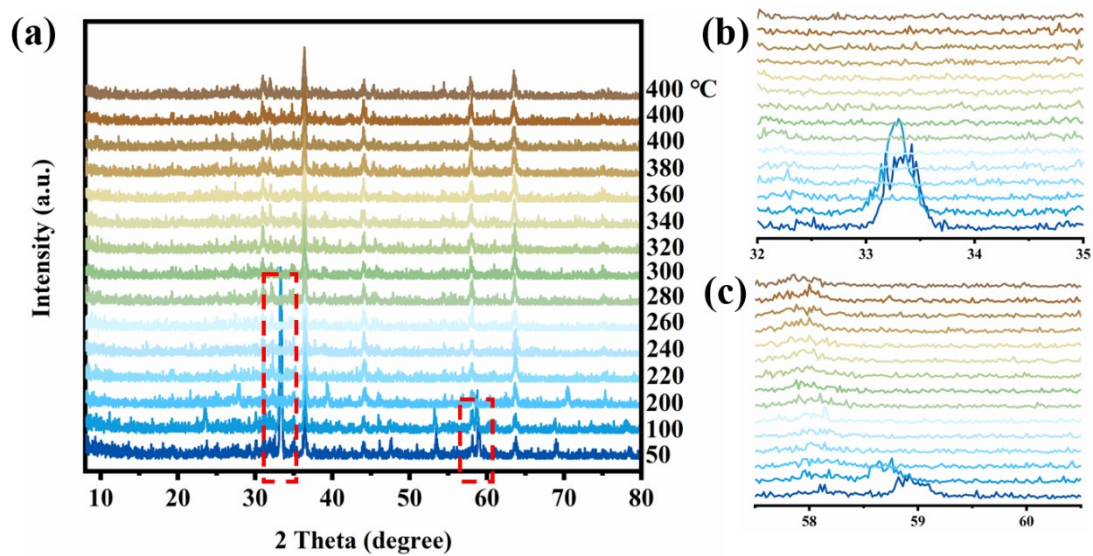

**Fig. S3** (a) In situ XRD spectra of the mixed COPR and  $\text{NH}_4\text{Cl}$  at the temperature ranging from 50 to 400 °C. Enlarged spectra ranging from (b) 32°-35° and (c) 57.5°-60.5° part in (a).

---

**Table S1.** Activation energy of  $\text{CrCl}_3 \cdot 6\text{H}_2\text{O}$  volatilization calculated by FWO method.

| $\alpha$       | $R^2$ | $E_a$ (kJ/mol) |
|----------------|-------|----------------|
| 0.2            | 0.984 | 73.72          |
| 0.3            | 0.996 | 164.38         |
| 0.4            | 0.999 | 225.33         |
| 0.5            | 0.930 | 222.65         |
| 0.6            | 0.964 | 1696.43        |
| 0.7            | 0.419 | 278.48         |
| 0.8            | 0.889 | 255.12         |
| 0.9            | 0.939 | 205.36         |
| <b>Average</b> | -     | 390.18         |

---

---

**Table S2.** Kinetic mechanism function and standard deviation.

| No. | reaction model               | standard deviation |
|-----|------------------------------|--------------------|
| 1   | Avrami-Erofeev, m=4          | 1.120              |
| 2   | Avrami-Erofeev, m=3          | 1.679              |
| 3   | Avrami-Erofeev, m=2          | 0.175              |
| 4   | Avrami-Erofeev, m=1.5        | 2.206              |
| 5   | Phase boundary reaction, n=1 | 0.187              |
| 6   | Phase boundary reaction, n=2 | 2.834              |
| 7   | Phase boundary reaction, n=3 | 2.002              |
| 8   | One-dimensional diffusion    | 0.846              |
| 9   | Two-dimensional diffusion    | 8.977              |
| 10  | Three-dimensional diffusion  | 0.159              |
| 11  | Jander' type diffusion       | 0.140              |
| 12  | Power law, n=1/4             | 0.164              |
| 13  | Power law, n=1/3             | 0.249              |
| 14  | Power law, n=1/2             | 0.455              |
| 15  | Power law, n=2/3             | 0.578              |
| 16  | First order                  | 1.028              |

---

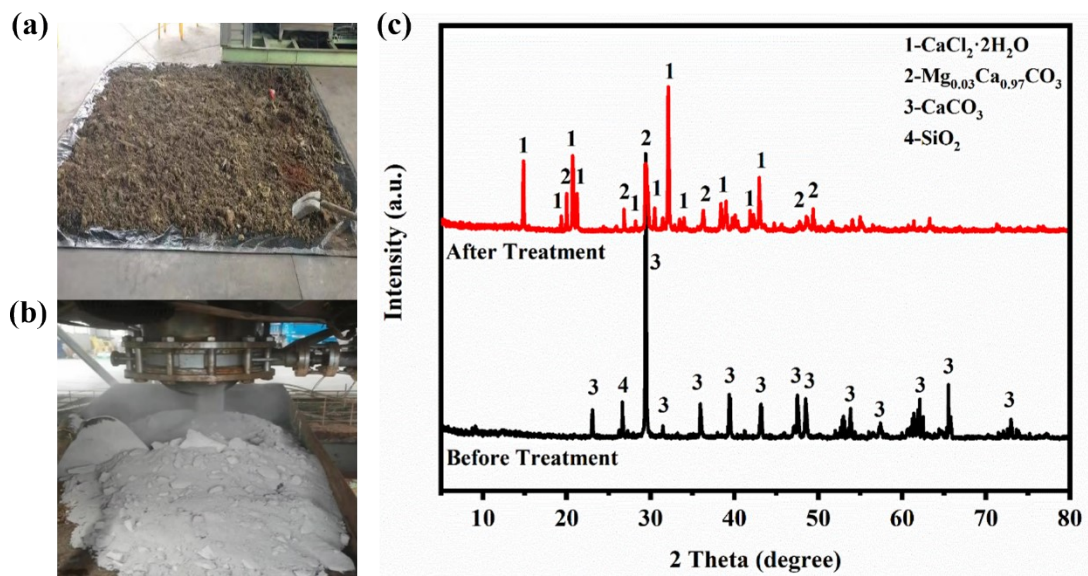

**Fig. S4** Digital images (a) before and (b) after the pilot reaction. (c) XRD patterns of COPR before and after the pilot reaction.

---

|                   |                                                                                   |                                                                                   |                                                                                    |                                                                                     |
|-------------------|-----------------------------------------------------------------------------------|-----------------------------------------------------------------------------------|------------------------------------------------------------------------------------|-------------------------------------------------------------------------------------|
| Powder            |  |  |  |  |
| Leaching solution |  |  |  |  |

**Fig. S5** Digital images of raw residues and leaching solution of powders after extracting Cr in three repeated pilot tests.



---

**Table S3.** Cr extraction rates of three Cr-containing wastes after the chlorination treatment.

| <b>Types</b> | <b>Treatment</b>             | <b>Extraction rate of Cr</b> |
|--------------|------------------------------|------------------------------|
| ES           | Chlorination + acid leaching | 82.1%                        |
| TS           | Chlorination                 | 85.3%                        |
| SSS          | Chlorination + acid leaching | 93.1%                        |

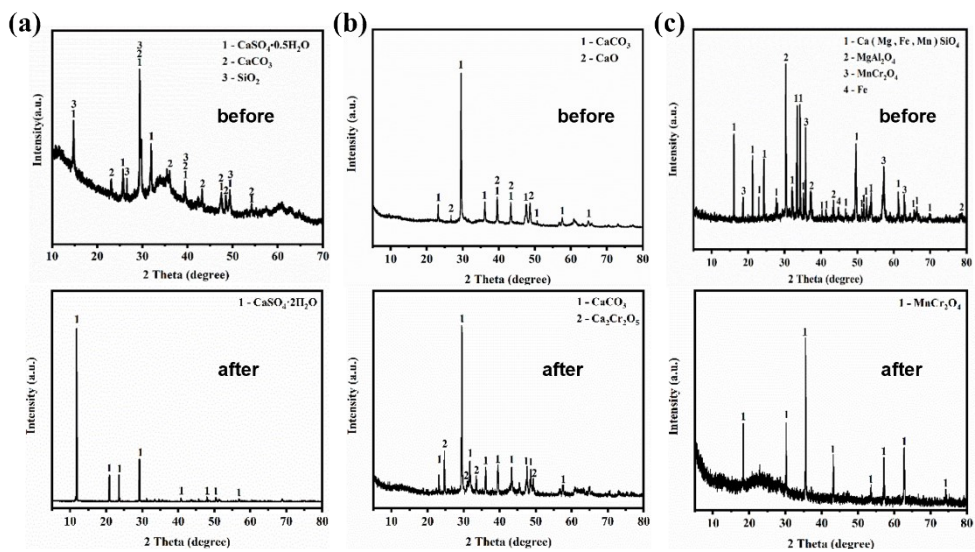

**Fig. S6** XRD patterns of (a) ES, (b) TS and (c) SSS before and after the chlorination treatment.
